# Supplementary material for: Tailoring the morphology of Pt3Cu1nanocrystals supported on graphene nanoplates for ethanol oxidation
Source: Royal Society of Chemistry journal article supplement (doi:10.1039/c5nr08013d), 2016-01-01
Supplement: c5nr08013d1.pdf [file c5nr08013d1.pdf]

## Supporting Information

### **Tailoring the morphology of Pt<sub>3</sub>Cu<sub>1</sub> nanocrystals supported on graphene nanoplates for ethanol oxidation**

Genlei Zhang<sup>a</sup>, Zhenzhen Yang<sup>b</sup>, Wen Zhang<sup>a</sup>, Hongwei Hu<sup>a</sup>, Chunzhen Wang<sup>a</sup>,  
Chengde Huang<sup>c</sup>, Yuxin Wang<sup>a, \*</sup>

<sup>a</sup> School of Chemical Engineering and Technology, State Key Laboratory of Chemical Engineering, Co-Innovation Center of Chemical Science & Engineering, Tianjin Key Laboratory of Membrane Science and Desalination Technology, Tianjin University, Weijin Road, Tianjin 300072, PR China

<sup>b</sup> School of Chemical Engineering and Technology, State Key Laboratory of Chemical Engineering, Co-Innovation Center of Chemical Science & Engineering, Tianjin University, Weijin Road, Tianjin 300072, PR China

<sup>c</sup> School of Chemical Engineering and Technology, Department of Applied Chemistry, Tianjin University, Weijin Road, Tianjin 300072, PR China

\* Corresponding author. Tel./fax: +86 22 27890515.

E-mail address: yxwang@tju.edu.cn (Y. Wang)

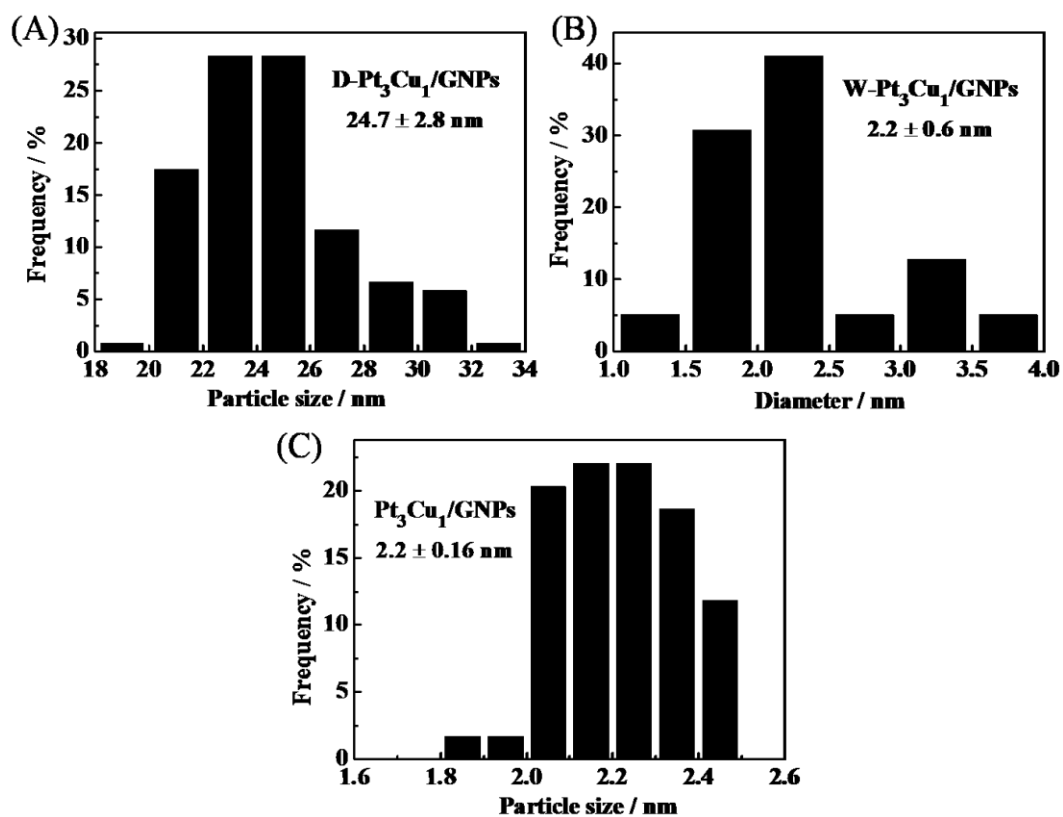

**Figure S1** (A) Sizes distributions of D-Pt<sub>3</sub>Cu<sub>1</sub>/GNPs; (B) Diameter distributions of W-Pt<sub>3</sub>Cu<sub>1</sub>/GNPs; (C) Sizes distributions of Pt<sub>3</sub>Cu<sub>1</sub>/GNPs.

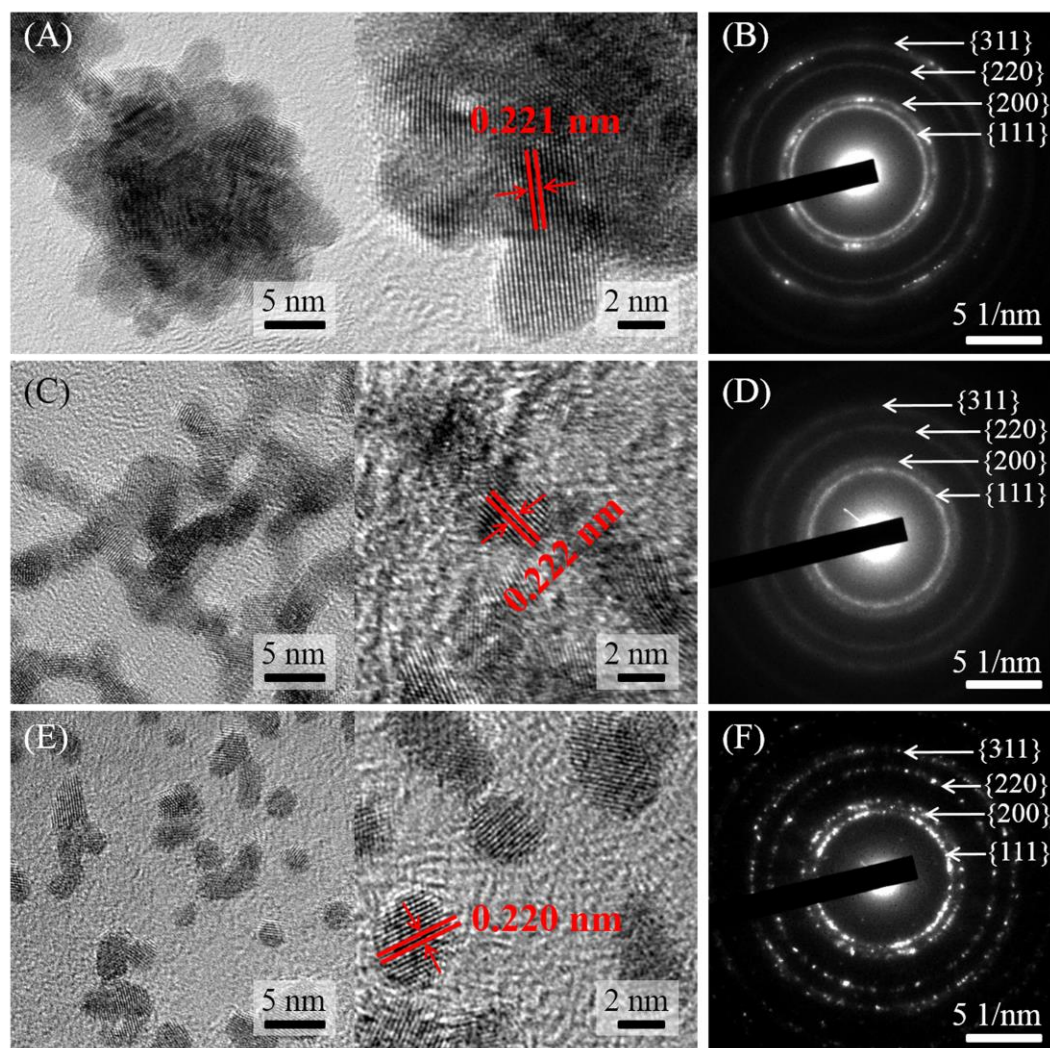

**Figure S2** High resolution transmission electron microscopy (HRTEM) and selected area electron diffraction (SAED) images of (A, B) D-Pt<sub>3</sub>Cu<sub>1</sub>/GNPs, (C, D) W-Pt<sub>3</sub>Cu<sub>1</sub>/GNPs and (E, F) Pt<sub>3</sub>Cu<sub>1</sub>/GNPs.

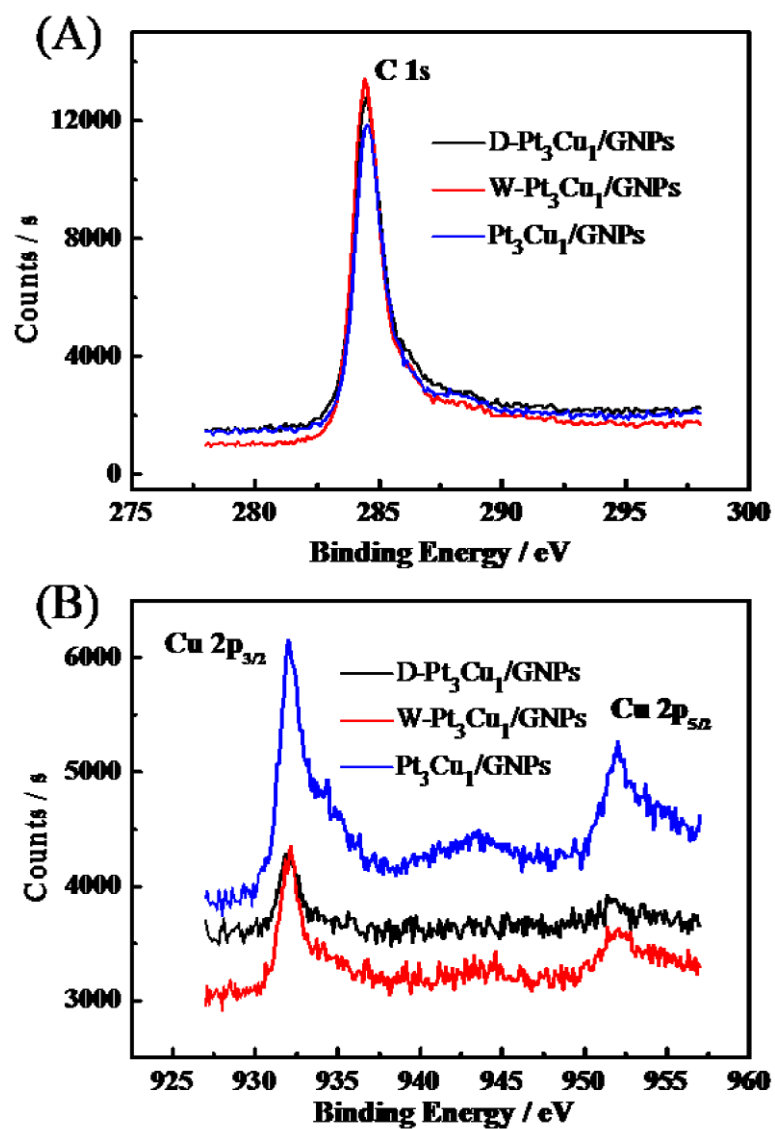

**Figure S3** XPS spectra of C 1s and Cu 2p regions for D-Pt<sub>3</sub>Cu<sub>1</sub>/GNPs, W-Pt<sub>3</sub>Cu<sub>1</sub>/GNPs, Pt<sub>3</sub>Cu<sub>1</sub>/GNPs and Pt/GNPs.

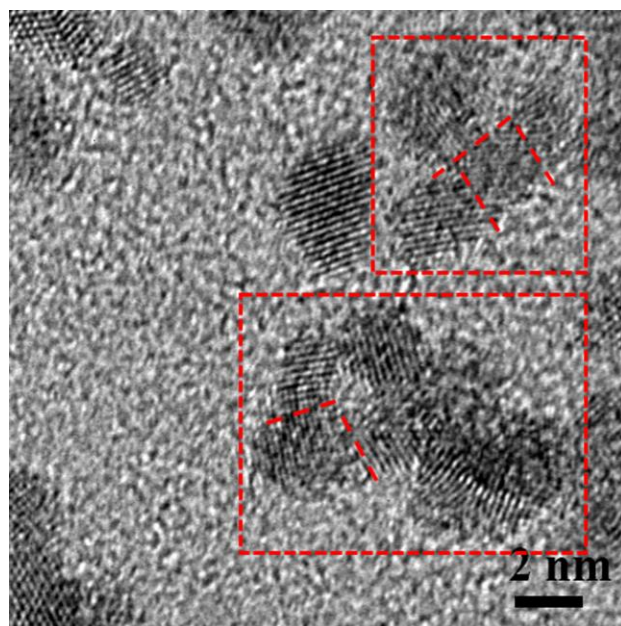

**Figure S4** HRTEM images of Pt<sub>3</sub>Cu<sub>1</sub> NDs obtained at the reaction time  $t = 1$  min.

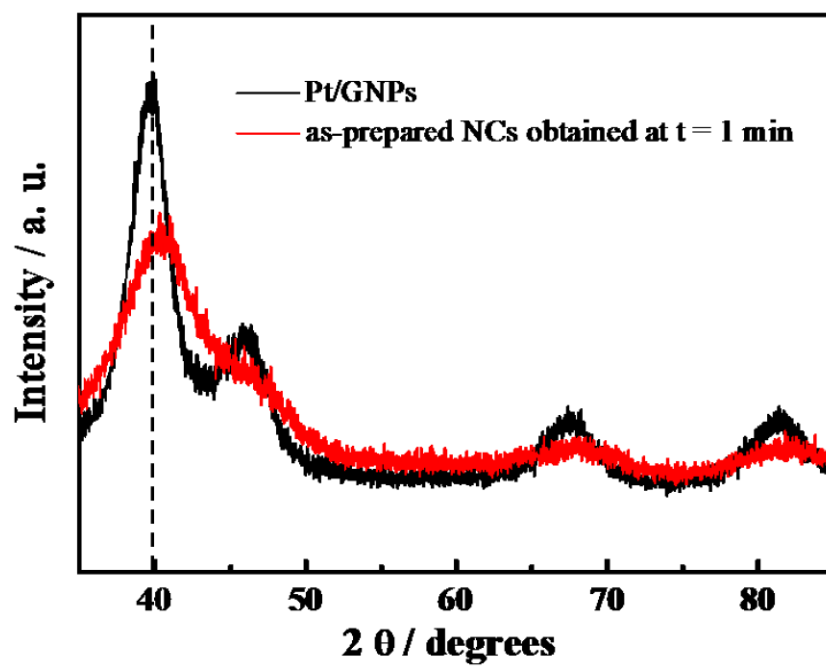

**Figure S5** XRD pattern of NCs obtained at dropping time  $t = 1$  min while the pH of reaction solution was 3.

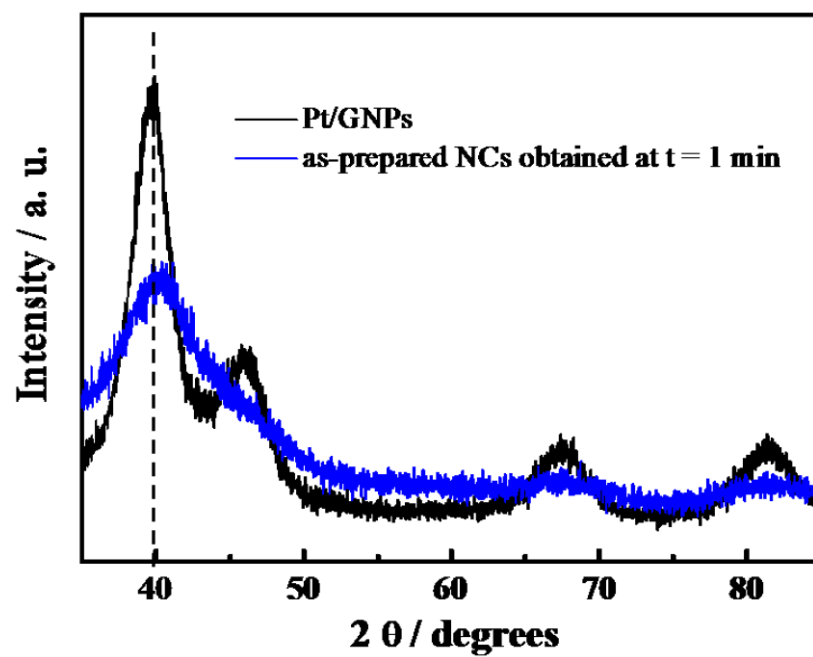

**Figure S6** XRD pattern of NCs obtained at dropping time  $t = 1$  min while the pH of reaction solution was 4.5.

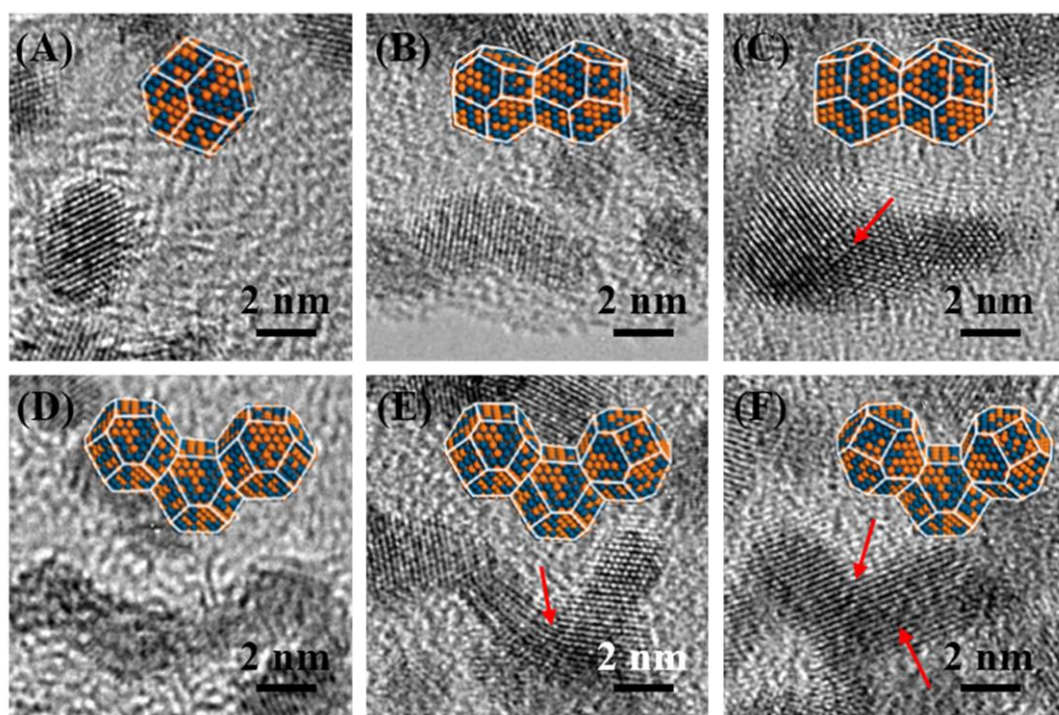

**Figure S7** HRTEM images and the corresponding schematic illustrations showing the early growing stages: (A) a primary particle; two particles connected through (B) MA and (C) TA growths; (D-F) three particles connected through either MA or TA growth, respectively. The twin planes were indicated by red arrows.



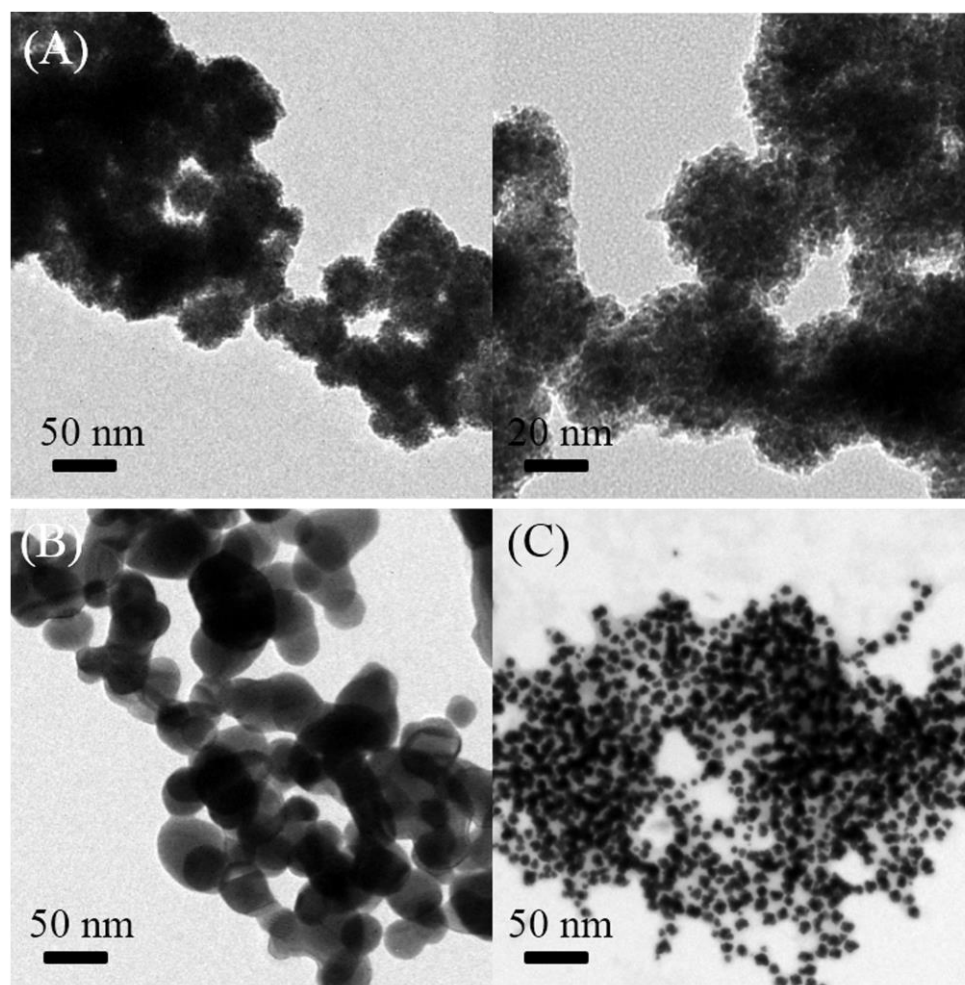

**Figure S8** Representative TEM images of the unsupported NCs synthesized in the absence of GNPs while the pH values of reaction solution were (A) 3, (B) 4.5 and (C) 6.

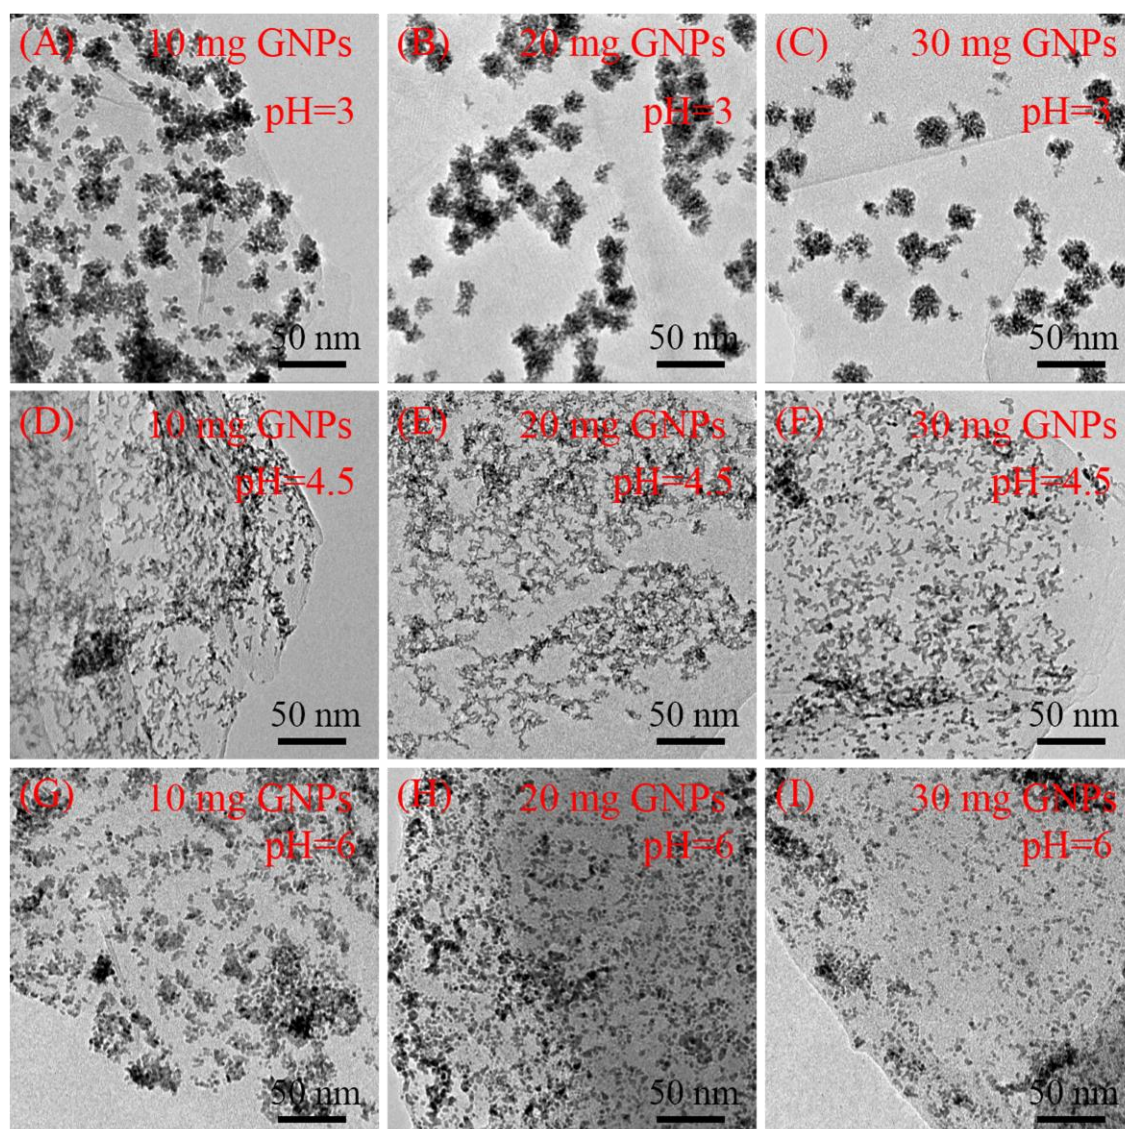

**Figure S9** Representative TEM images of the Pt-Cu NCs obtained using the standard procedure but the pH values of the reaction solution were varying with the introduction of different amounts of GNPs: (A) 10 mg, (B) 20 mg and (C) 30 mg while the pH of reaction solution was 3; (D) 10 mg, (E) 20 mg and (F) 30 mg while the pH of reaction solution was 4.5; (G) 10 mg, (H) 20 mg and (I) 30 mg while the pH of reaction solution was 6.

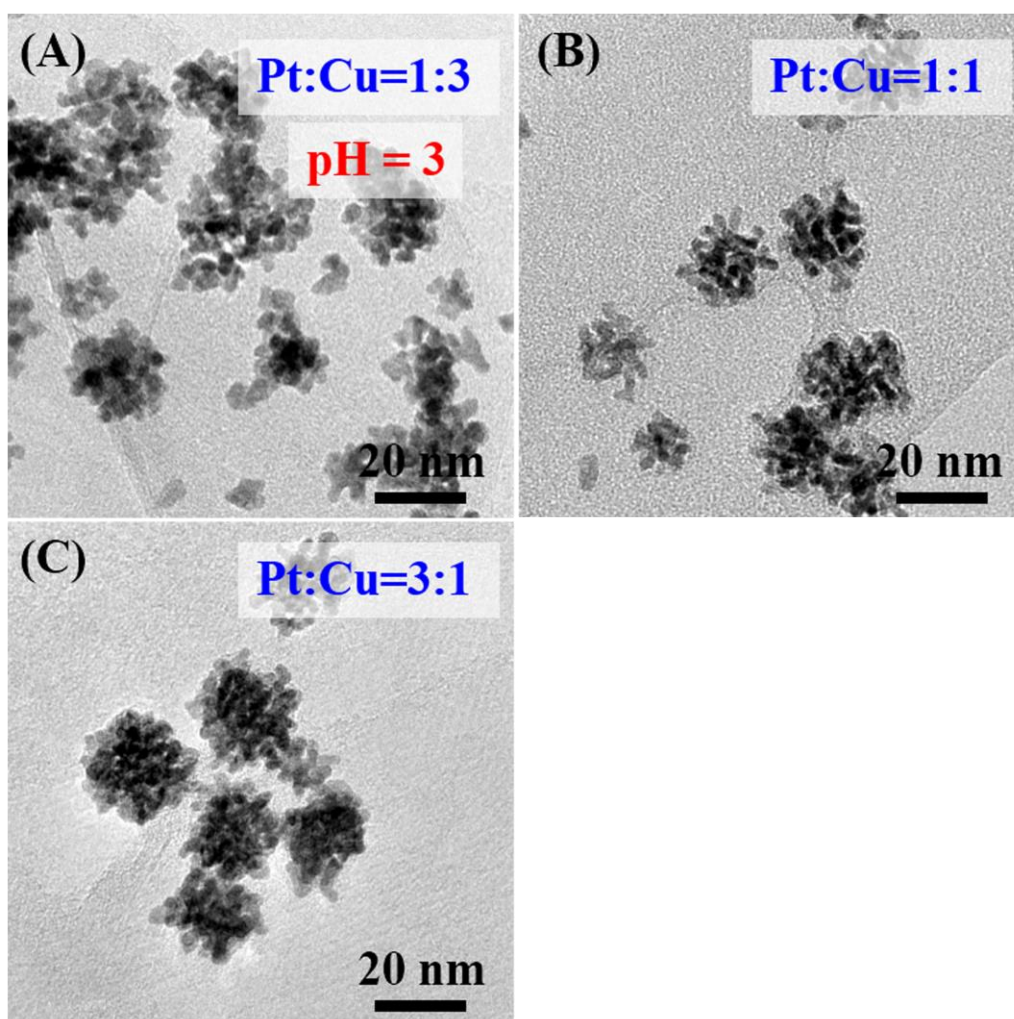

**Figure S10** TEM images of Pt-Cu NCs with different morphologies supported on GNPs that were prepared using the standard procedure, but the  $\text{PtCl}_6^{2-}/\text{Cu}^{2+}$  molar ratios were different: (A) 1:3, (B) 1:1, (C) 3:1.



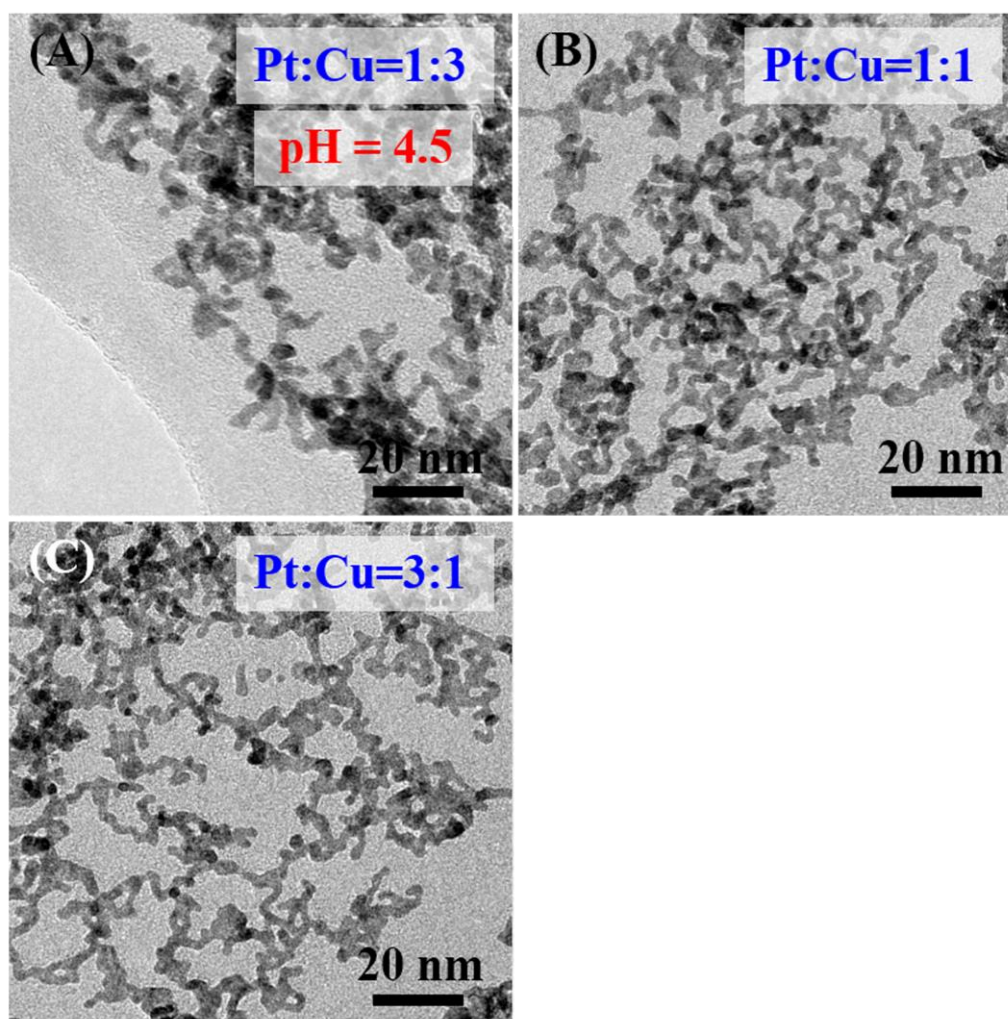

**Figure S11** TEM images of Pt-Cu NCs with different morphologies supported on GNPs that were prepared using the standard procedure but the pH values of the reaction solution were adjusted to 4.5, with the different  $\text{PtCl}_6^{2-}/\text{Cu}^{2+}$  molar ratios: (A) 1:3, (B) 1:1, (C) 3:1.

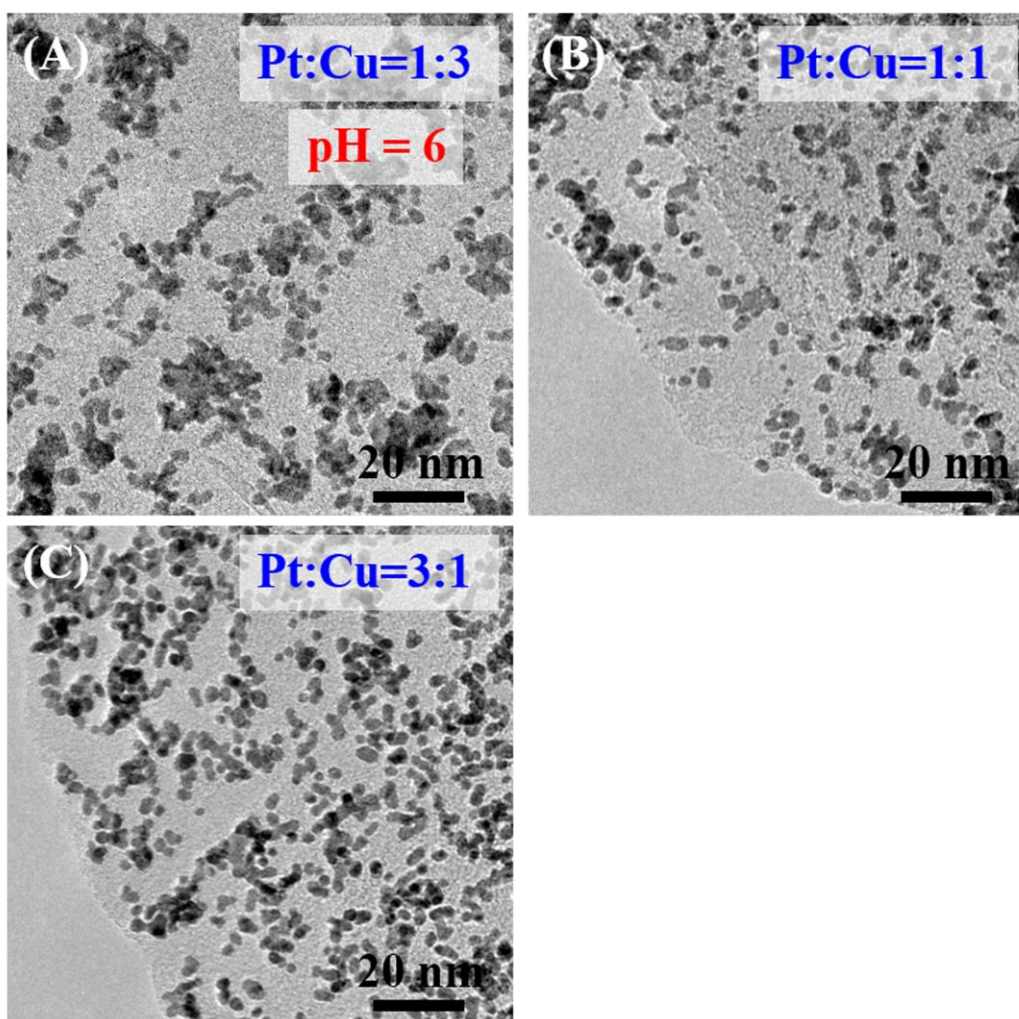

**Figure S12** TEM images of Pt-based NCs with different morphologies supported on GNPs that were prepared using the standard procedure but the pH values of the reaction solution were adjusted to 6, with the different  $\text{PtCl}_6^{2-}/\text{Cu}^{2+}$  molar ratios: (A) 1:3, (B) 1:1, (C) 3:1.

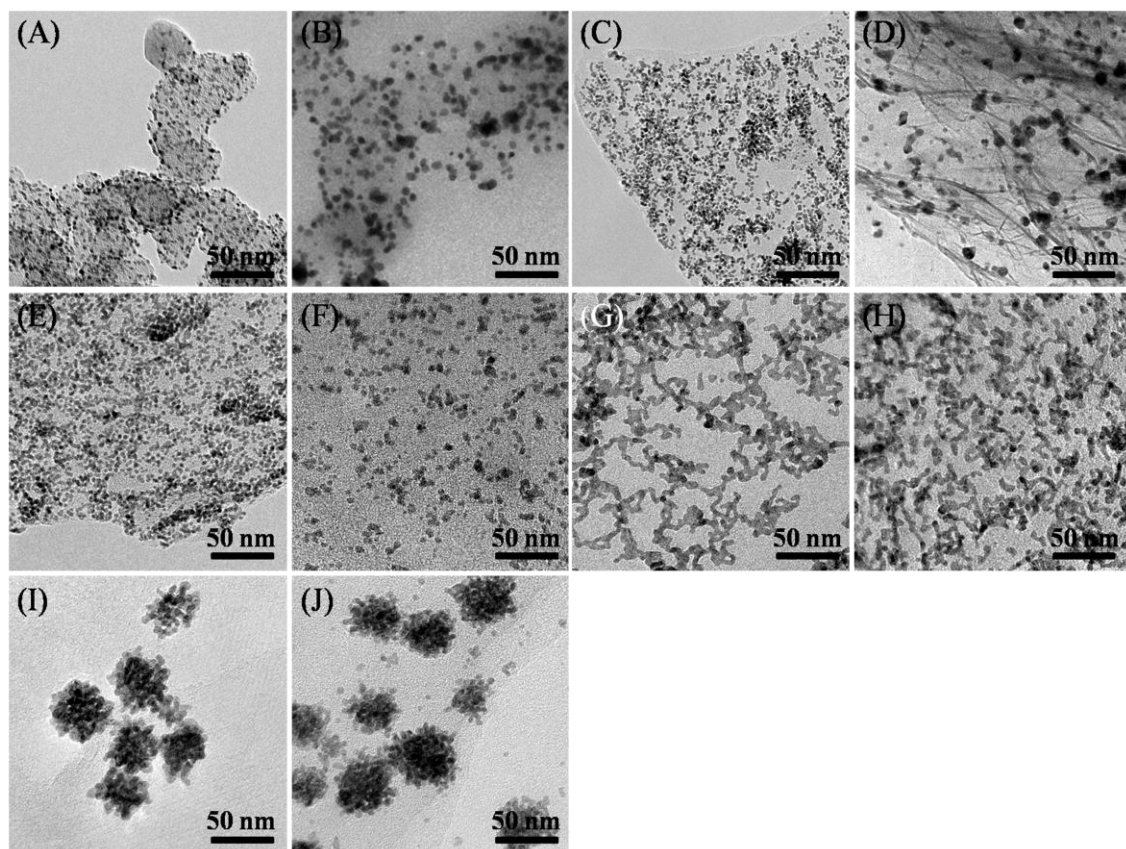

**Figure S13** TEM images of (A, B) Pt/C-JM, (C, D) Pt/GNPs, (E, F) Pt<sub>3</sub>Cu<sub>1</sub>/GNPs, (G, H) W-Pt<sub>3</sub>Cu<sub>1</sub>/GNPs and (I, J) D-Pt<sub>3</sub>Cu<sub>1</sub>/GNPs before (A, C, E, G and I) and after (B, D, F, H and J) 500 cycles CVs in a 0.5 M KOH solution containing 0.5 M ethanol at 50 mV s<sup>-1</sup>.

**Table S1** Measured and calculated lattice spacings from both HRTEM images as well as SAED, corresponding to the (111) plane of the Pt fcc lattice.

| <b>Sample</b>                           | <b>Measured by<br/>HRTEM</b> | <b>Measured by<br/>SAED</b> | <b>Calculated</b>      |
|-----------------------------------------|------------------------------|-----------------------------|------------------------|
| Pt                                      | -                            | -                           | 0.2265 nm <sup>1</sup> |
| D-Pt <sub>3</sub> Cu <sub>1</sub> /GNPs | 0.221 nm                     | 0.222 nm                    | 0.2219 nm              |
| W-Pt <sub>3</sub> Cu <sub>1</sub> /GNPs | 0.222 nm                     | 0.221 nm                    | 0.2219 nm              |
| Pt <sub>3</sub> Cu <sub>1</sub> /GNPs   | 0.220 nm                     | 0.223 nm                    | 0.2219 nm              |
| Cu                                      | -                            | -                           | 0.208 nm <sup>2</sup>  |

**Table S2** Summary of the loading and composition data for the catalysts on the basis of ICP-MS and XPS analysis.

| Catalysts                               | $\text{PtCl}_6^{2-}/\text{Cu}^{2+}$<br>(mol/mol) | Metal Loading by ICP-MS |      |             | Pt/Cu by  | Pt/Cu by  |
|-----------------------------------------|--------------------------------------------------|-------------------------|------|-------------|-----------|-----------|
|                                         |                                                  | (wt. %)                 |      |             | ICP-MS    | XPS       |
|                                         |                                                  | Pt                      | Cu   | Total Metal | (mol/mol) | (mol/mol) |
| D-Pt <sub>3</sub> Cu <sub>1</sub> /GNPs | 3 : 1                                            | 17.43                   | 1.85 | 19.28       | 3.06:1    | 2.96:1    |
| W-Pt <sub>3</sub> Cu <sub>1</sub> /GNPs | 3 : 1                                            | 17.29                   | 1.84 | 19.13       | 3.09:1    | 2.99:1    |
| Pt <sub>3</sub> Cu <sub>1</sub> /GNPs   | 3 : 1                                            | 17.17                   | 1.85 | 19.02       | 3.04:1    | 3.05:1    |



**Table S3** Electrochemical surface areas (ECSAs) of all catalysts estimated from the columbic charges corresponding to the oxide reduction peak and mass activities for ethanol oxidation in this work.

| Catalyst                                | ECSA / $\text{m}^2 \text{ g}_{\text{Pt}}^{-1}$ | Mass activity / A<br>$\text{mg}_{\text{Pt}}^{-1}$ | Specific activity /<br>$\text{mA cm}^{-2}$ |
|-----------------------------------------|------------------------------------------------|---------------------------------------------------|--------------------------------------------|
| D-Pt <sub>3</sub> Cu <sub>1</sub> /GNPs | 93.93                                          | 6.01                                              | 85.84                                      |
| W-Pt <sub>3</sub> Cu <sub>1</sub> /GNPs | 84.79                                          | 4.52                                              | 64.08                                      |
| Pt <sub>3</sub> Cu <sub>1</sub> /GNPs   | 77.86                                          | 3.16                                              | 44.52                                      |
| Pt/GNPs                                 | 64.23                                          | 1.331                                             | 21.82                                      |
| Pt/C-JM                                 | 52.36                                          | 0.796                                             | 13.06                                      |

1. Y. Shiraishi, Y. Takeda, Y. Sugano, S. Ichikawa, S. Tanaka and T. Hirai, *Chemical Communications*, 2011, **47**, 7863-7865.
2. F. Wiame, V. Maurice and P. Marcus, *Surface science*, 2007, **601**, 1193-1204.
